# Supplementary material
Source: PubMed Central journal article supplement (PMC8503860)

**Supplemental Figure 1.** Zoom plot displaying genome-wide association results for inter-hemispheric low theta coherence (P3-O1—P4-O2) in the (a) meta-analysis, (b) African ancestry, and (c) European ancestry subsample.

(a)

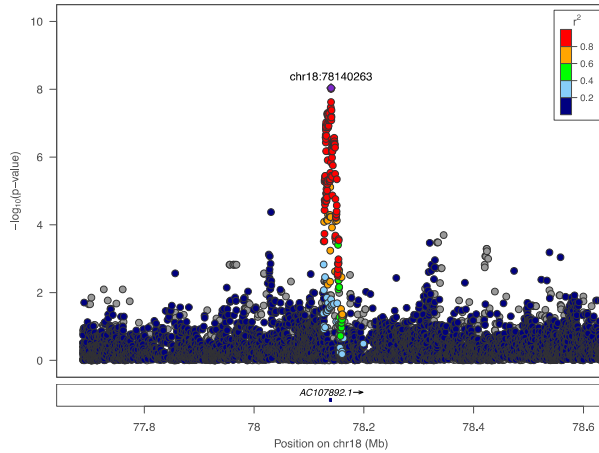

(b)

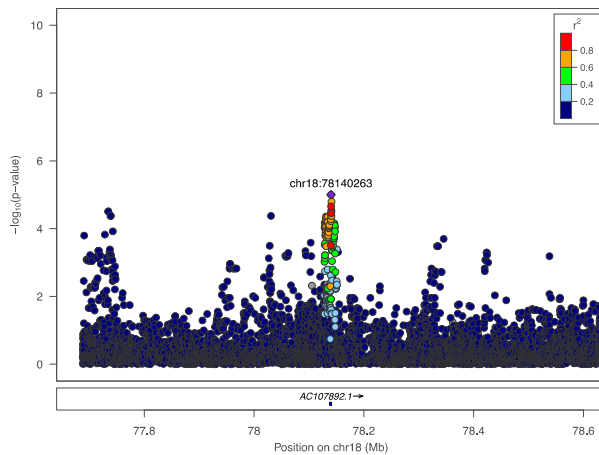

(c)

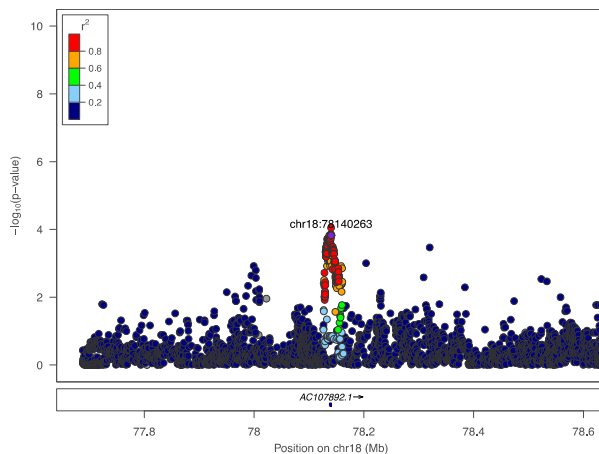

**Supplemental Figure 1 Footnote:** Association results for low theta electroencephalogram coherence on chromosome 18q23. Y axis denotes the  $-\log_{10}$  (P-value) for association. X axis is the physical position on the chromosome (Mb, hg38). The most significantly associated SNP (rs12954372) is shown in purple. The extent of linkage disequilibrium (LD; as measured by  $r^2$ ) between each SNP and the most significantly associated SNP is indicated by the color scale at the top left. Larger values of  $r^2$  indicate greater LD. LD is based on hg38 1000 Genomes.

**Supplemental Figure 2.** Associations of rs12954372 with developmental trajectories of low theta bipolar EEG coherence (P3-O1--P4-O2) are observed within females in early adulthood (dotted lines) but not males (solid lines) in a longitudinal subsample of COGA (N: 2,316)

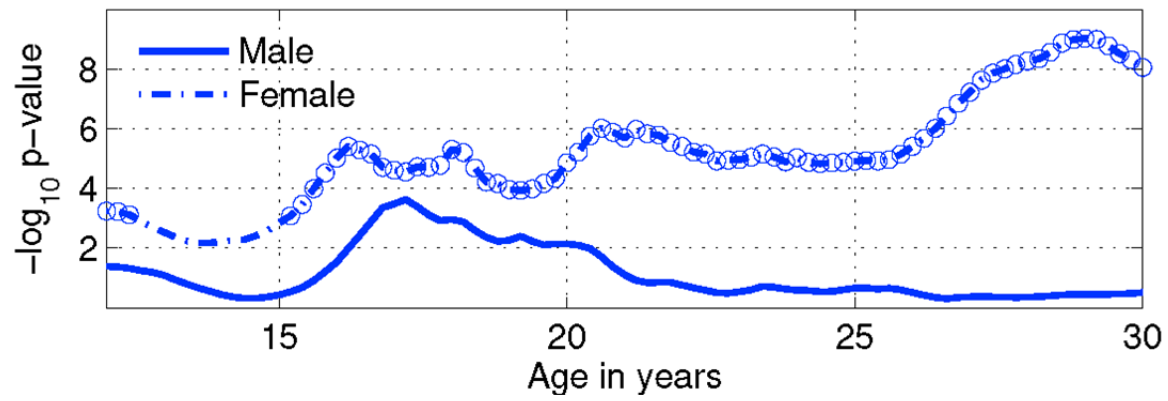

**Supplemental Figure 3.** Expression of *AC107892.1* in Genotype-Tissue Expression (GTEx)

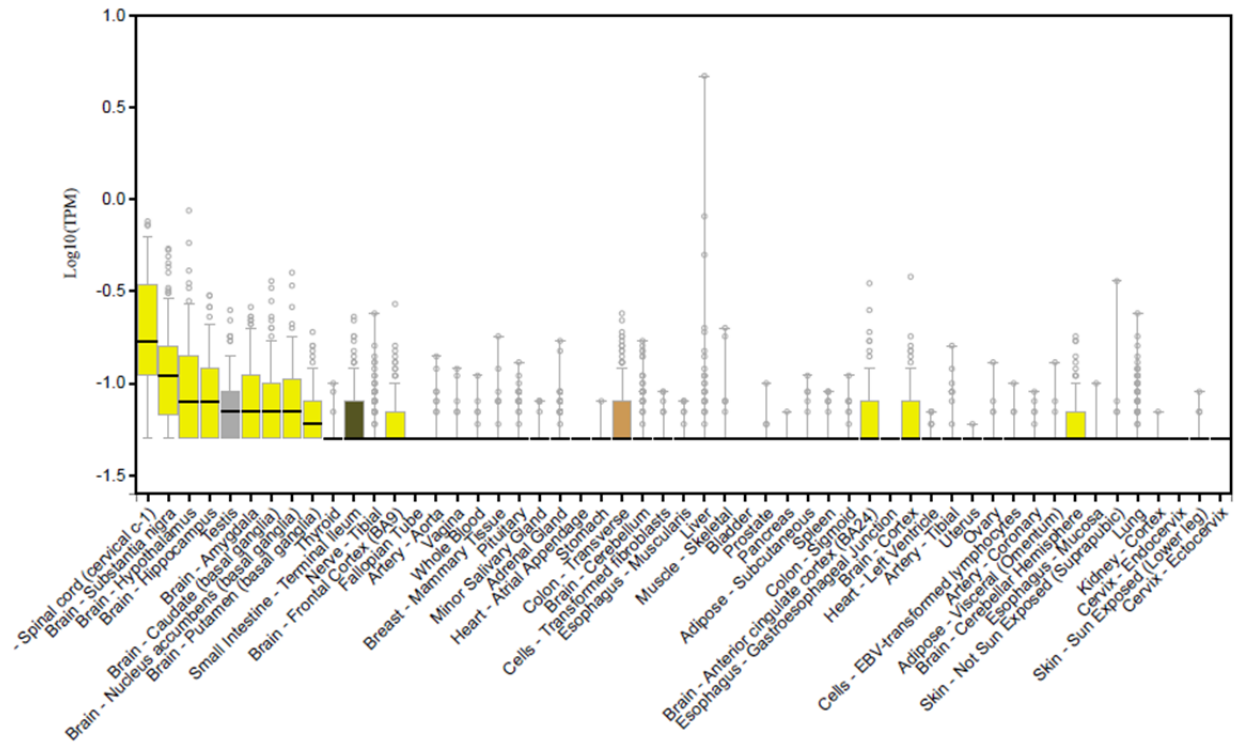

**Supplemental Figure 4.** rs12954372 interacts with *Myelin Basic Protein (MBP)* in hippocampal (panel a) and dorsolateral prefrontal cortex (panel b) tissue

**A. Hippocampus Tissue**

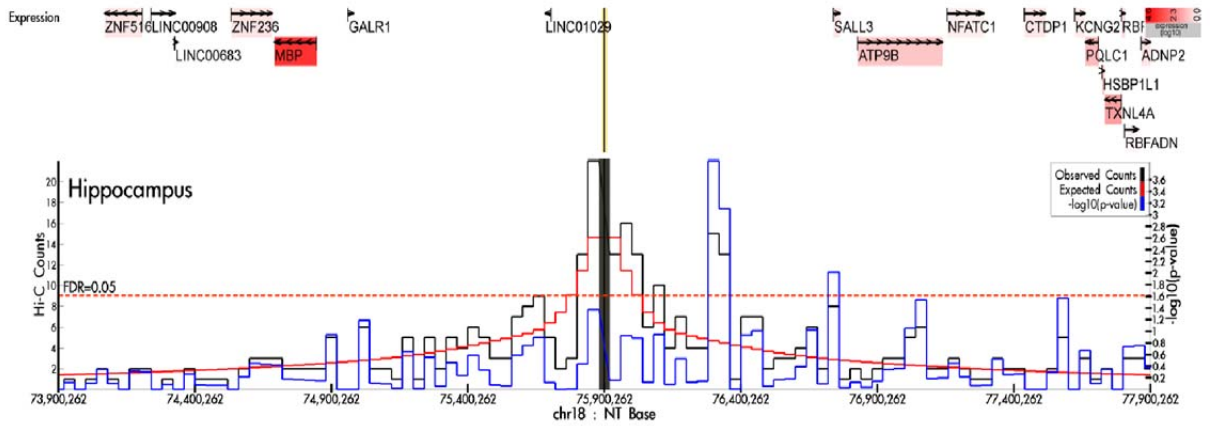

**B. Dorsolateral Prefrontal Cortex Tissue**

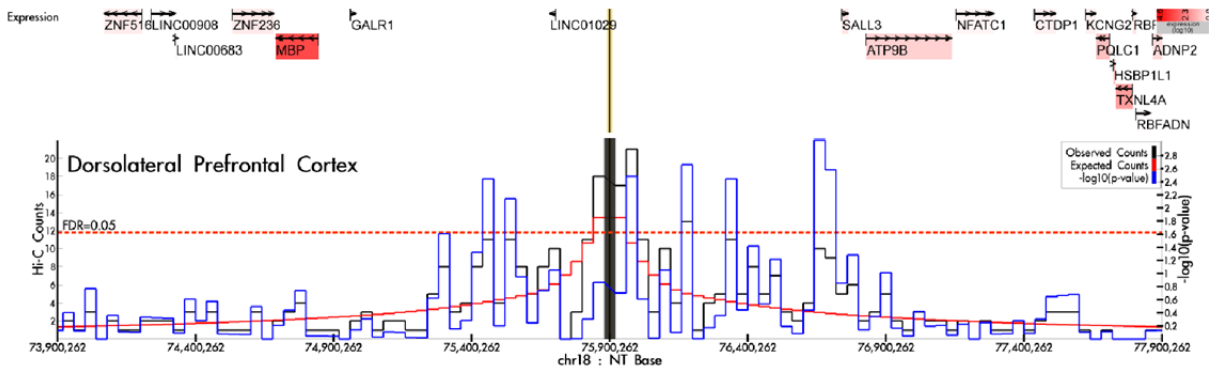

**Footnote:** High-confidence chromatin interaction statistics were obtained from hippocampal tissue and dorsolateral prefrontal cortex tissue in embryonic neural progenitor cell lines through HUGIn (Hi-C Unifying Genomic Interrogator). Long range chromatin interactions were anchored on top associated variants and computed statistical significance of contact at each locus.

**Supplemental Figure 5.** Schematic of the bipolar electrode pairs (connected with solid lines) and coherence pairs (connected with dotted lines) derived between bipolar electrode pairs. Parietal-occipital sagittal coherence pairs are represented in purple; P4-O2--P3-O1. Central-parietal sagittal coherence pairs are represented in red; C4-P4--C3-P3. Intra-hemispheric lateral coherence pairs are represented in blue; P7-P3--F7-F3, P8-P4--F8-F4.

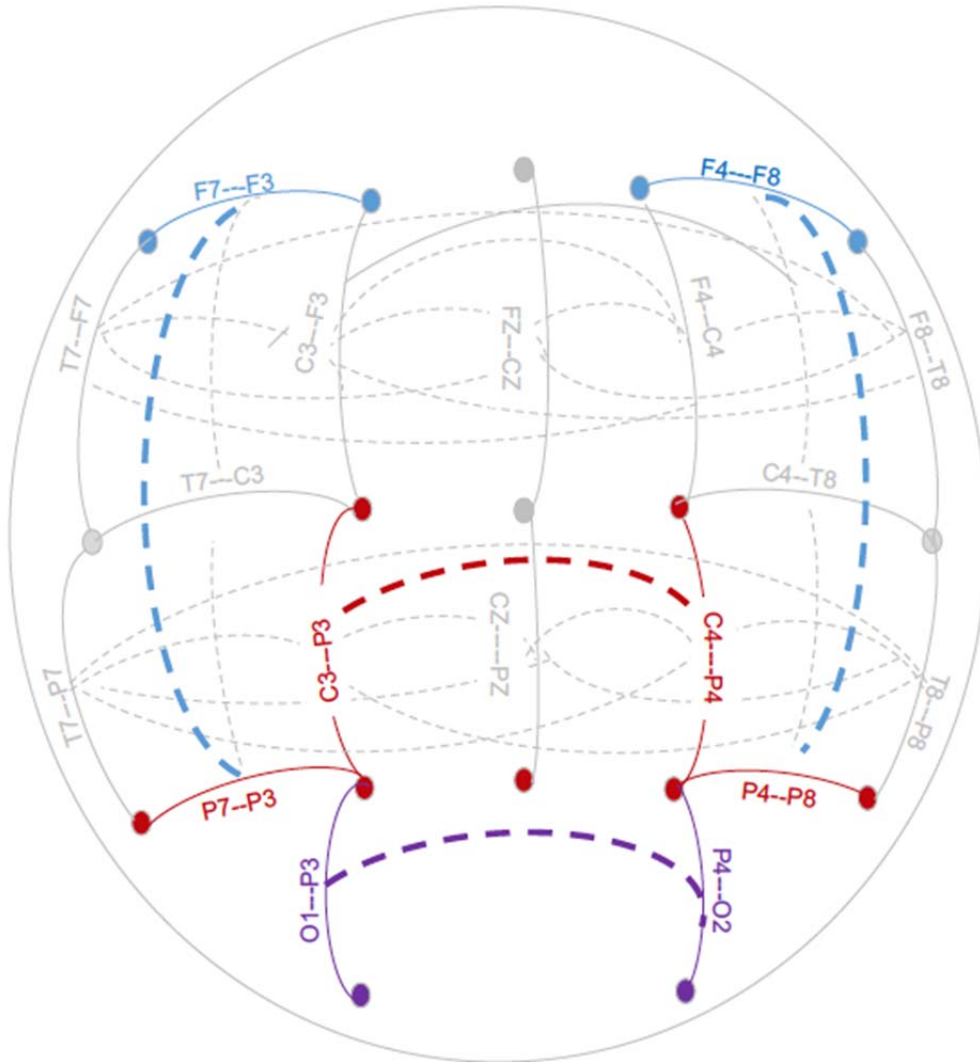

**Supplemental Figure 6.** Q-Q Plot for genome-wide meta-analysis association results for interhemispheric low theta coherence (P3-O1—P4-O2)

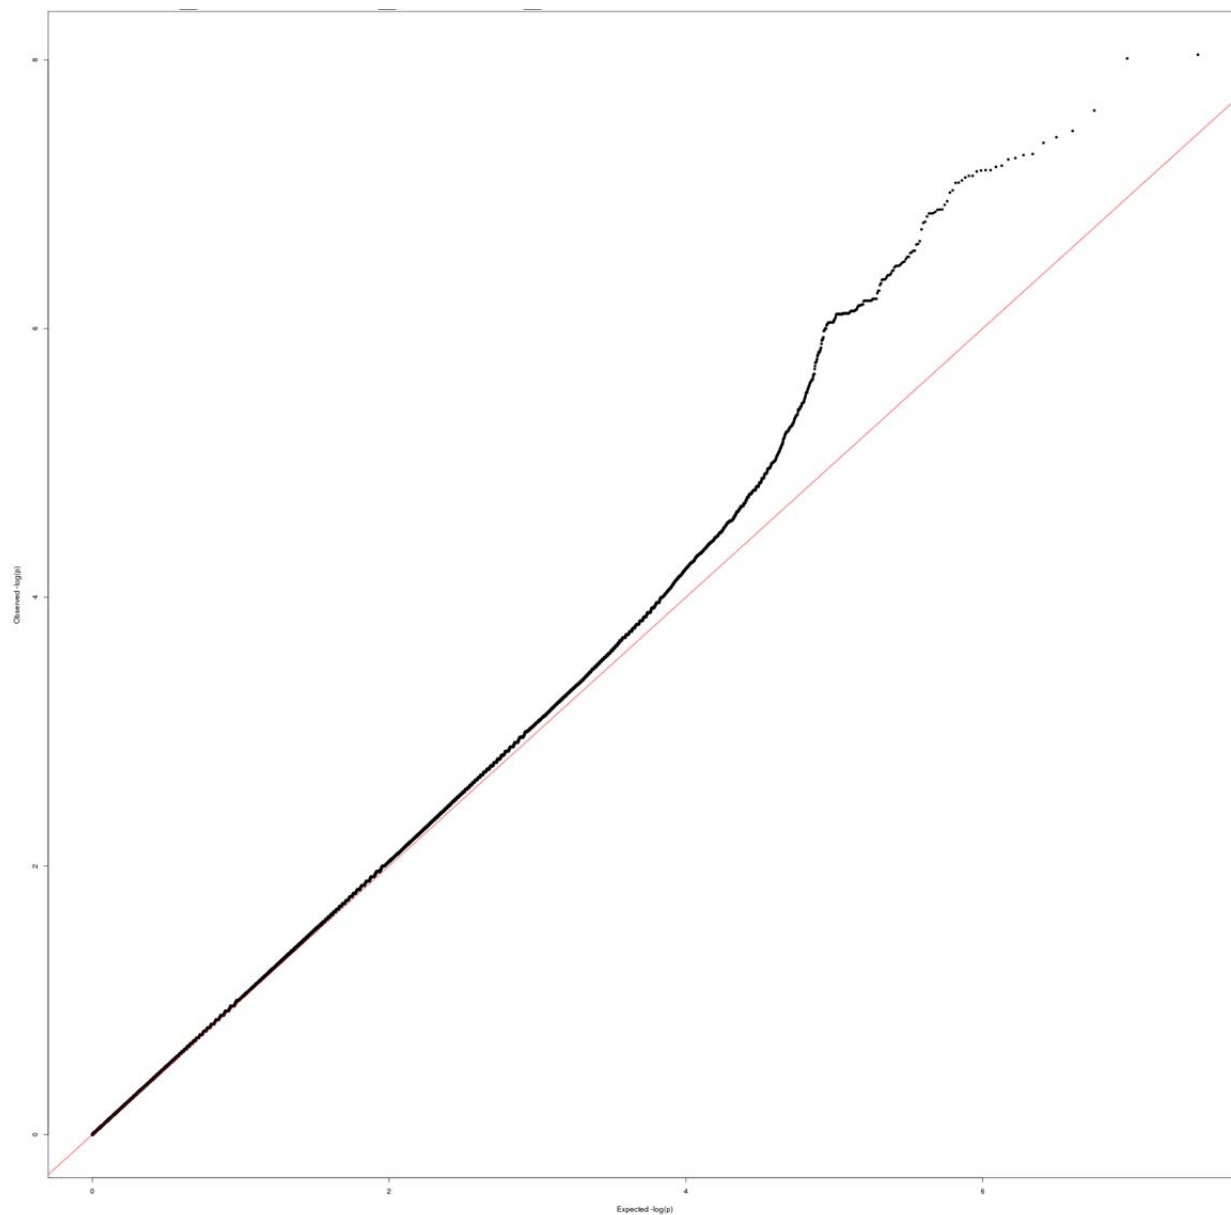

Supplement: NIHMS1686757-supplement-Supplemental_Figures.pdf [file NIHMS1686757-supplement-Supplemental_Figures.pdf]
