# Supplementary material
Source: PubMed Central journal article supplement (PMC8503860)
Supplement: NIHMS1686757-supplement-Supplemental_Tables.pdf [file NIHMS1686757-supplement-Supplemental_Tables.pdf]

**Supplemental Table 1: Descriptive Characteristics of Analytic COGA Subsamples**

|                         | COGA Sample    |                |                | EEG Subsample  |                |                | Prospective Study Subsample |               |               | MRI Subsample |               |               |
|-------------------------|----------------|----------------|----------------|----------------|----------------|----------------|-----------------------------|---------------|---------------|---------------|---------------|---------------|
|                         | Total          | EA             | AA             | Total          | EA             | AA             | Total                       | EA            | AA            | Total         | EA            | AA            |
| Genotyped (N)           | 10365          | 8038           | 3654           | 8810           | 6644           | 2166           | 2316                        | 1265          | 1051          | 60            | 37            | 23            |
| Female (%)              | 53.1           | 53.0           | 53.1           | 50.5           | 51.0           | 50.1           | 52.3                        | 51.5          | 50.6          | 52.6          | 25.0          | 53.3          |
| Mean Age (SD)           | 35.4<br>(12.2) | 37.4<br>(13.2) | 34.4<br>(11.2) | 29.4<br>(12.3) | 32.1<br>(13.1) | 28.9<br>(11.9) | 17.3<br>(7.1)               | 17.7<br>(7.4) | 17.0<br>(6.5) | 25.3<br>(2.8) | 25.1<br>(3.7) | 25.5<br>(2.4) |
| Ever Drinkers           | 93.9           | 95.6           | 92.4           | 92.3           | 95.6           | 92.4           | 83.8                        | 81.5          | 85.5          | 79.5          | 85.7          | 66.7          |
| DSM-IV AD Diagnosis (%) | 27.6           | 29.5           | 26.4           | 26.3           | 29.5           | 26.4           | 13.8                        | 17.8          | 10.2          | 24.5          | 25.7          | 22.9          |

Note: EEG, Prospective, and MRI study participants were included in COGA's discovery GWAS sample.

**Supplemental Table 2.** Associations of rs12954372 with EEG coherence in theta (low and high) bands from posterior emanating inter-hemispheric and intra-hemispheric bipolar pairs within COGA

| Phenotype                                         | Frequency | Z-score | <i>p-value</i> |
|---------------------------------------------------|-----------|---------|----------------|
| <i>Posterior interhemispheric coherence</i>       |           |         |                |
| P4-O2--P3-O1: Low theta                           | 3-5 Hz    | 5.75    | 9.15E-09*      |
| P4-O2--P3-O1: High theta                          | 5-7 Hz    | 4.26    | 7.44E-06*      |
| P4-O2--P3-O1: Full theta                          | 3-7 Hz    | 5.12    | 3.06E-07*      |
| <i>Centro-Parietal interhemispheric coherence</i> |           |         |                |
| C4-P4--C3-P3: Low theta                           | 3-5 Hz    | 3.16    | 7.29E-04*      |
| C4-P4--C3-P3: High theta                          | 5-7 Hz    | 2.74    | 4.88E-03*      |
| C4-P4--C3-P3: Full theta                          | 3-7 Hz    | 2.93    | 3.42E-03*      |
| <i>Long distance frontal-parietal coherence</i>   |           |         |                |
| P8-P4--F8-F4: Low theta                           | 3-5 Hz    | 2.81    | 6.17E-04*      |
| P8-P4--F8-F4: High theta                          | 5-7 Hz    | 2.75    | 3.37E-03*      |
| P8-P4--F8-F4: Full theta                          | 3-7 Hz    | 2.86    | 4.29E-03*      |
| P7-P3--F7-F3: Low theta                           | 3-5 Hz    | 1.93    | 9.22E-02       |
| P7-P3--F7-F3: High theta                          | 5-7 Hz    | 1.91    | 9.05E-02       |
| P7-P3--F7-F3: Full theta                          | 3-7 Hz    | 0.91    | 3.61E-01       |

\*Withstands a multiple test-correction (0.05/eight coherence phenotypes).

**Supplemental Table 3.** Chromosome 4 variants demonstrating association with interhemispheric centro-parietal low theta EEG coherence at C4-P4--C3-P3.

| <b>SNP</b>         | <b>Base-pair<br/>Position</b> | <b>Effect<br/>Allele</b> | <b>Minor Allele<br/>Frequency</b> | <b>Effect Size<br/>(Z-score)</b> | <b>Meta<br/><i>p</i>-value</b> |
|--------------------|-------------------------------|--------------------------|-----------------------------------|----------------------------------|--------------------------------|
| <b>rs116445911</b> | 103370526                     | A                        | 0.05092                           | 5.458                            | 4.82E-08                       |
| <b>rs17032641</b>  | 103370889                     | T                        | 0.05591                           | -3.575                           | 0.00035                        |
| <b>rs6821848</b>   | 103350758                     | T                        | 0.05531                           | 3.013                            | 0.00259                        |
| <b>rs17008528</b>  | 103383107                     | A                        | 0.0643                            | 2.975                            | 0.00293                        |
| <b>rs76573486</b>  | 103356402                     | T                        | 0.0625                            | 2.781                            | 0.00541                        |
| <b>rs77002140</b>  | 103383843                     | T                        | 0.05132                           | -2.703                           | 0.00687                        |
| <b>rs115547957</b> | 103383852                     | A                        | 0.05132                           | 2.703                            | 0.00687                        |
